# Supplementary material
Source: PubMed Central journal article supplement (PMC4733408)
Supplement: NIHMS746443-supplement-Tables.pdf [file NIHMS746443-supplement-Tables.pdf]

**Table 1S – Association of Top SNPs with TAC Longitudinal Troughs and No Additional Covariates in Discovery cohort. Adjusted for enrolling center.**

| CHR | SNP         | BP        | Locus               | BETA    | SE      | P-value                  |
|-----|-------------|-----------|---------------------|---------|---------|--------------------------|
| 7   | rs17161880  | 99348361  | <i>CYP3AP2</i>      | -0.3894 | 0.04852 | 9.26 x 10 <sup>-14</sup> |
| 7   | rs34880695  | 99348055  | <i>CYP3AP2</i>      | -0.3885 | 0.05093 | 1.03 x 10 <sup>-12</sup> |
| 7   | rs6465750   | 99235522  | <i>ZSCAN25</i>      | 0.3614  | 0.05654 | 1.34 x 10 <sup>-09</sup> |
| 7   | rs17161780  | 99238141  | <i>ZSCAN25</i>      | -0.5266 | 0.08329 | 1.70 x 10 <sup>-09</sup> |
| 7   | rs776746    | 99270539  | <i>CYP3A5</i>       | 0.3458  | 0.05517 | 2.28 x 10 <sup>-09</sup> |
| 7   | rs17161774  | 99210648  | <i>ZSCAN25</i>      | -0.5551 | 0.09517 | 2.24 x 10 <sup>-08</sup> |
| 7   | rs3735451   | 99355975  | <i>CYP3A4</i>       | 0.2949  | 0.05478 | 2.07 x 10 <sup>-07</sup> |
| 7   | rs1419745   | 99260092  | <i>CYP3A5</i>       | -0.2858 | 0.05497 | 5.04 x 10 <sup>-07</sup> |
| X   | rs144708905 | 8359071   | ---                 | 0.7596  | 0.1478  | 6.70 x 10 <sup>-07</sup> |
| 18  | rs554238    | 5986825   | <i>L3mbtl4</i>      | 0.2752  | 0.05425 | 9.07 x 10 <sup>-07</sup> |
| X   | rs115026930 | 113500375 | ---                 | 0.4119  | 0.08336 | 1.67 x 10 <sup>-06</sup> |
| 4   | rs78317738  | 124709544 | <i>LINC01091</i>    | 1.196   | 0.2469  | 2.58 x 10 <sup>-06</sup> |
| 7   | rs2394741   | 97495441  | <i>ASNS</i>         | 0.5893  | 0.122   | 2.74 x 10 <sup>-06</sup> |
| 18  | rs1941267   | 30429313  | <i>LOC105372058</i> | 0.2736  | 0.05706 | 3.24 x 10 <sup>-06</sup> |
| 2   | rs74613074  | 106183094 | ---                 | 1.005   | 0.2101  | 3.39 x 10 <sup>-06</sup> |
| 7   | rs1043466   | 99054289  | <i>CPSF4</i>        | 0.335   | 0.07122 | 4.84 x 10 <sup>-06</sup> |
| 6   | rs73774057  | 134742751 | ---                 | 0.6507  | 0.1388  | 5.16 x 10 <sup>-06</sup> |
| 6   | rs6454237   | 82343415  | ---                 | 0.3062  | 0.06534 | 5.21 x 10 <sup>-06</sup> |
| 7   | rs10242455  | 99240179  | <i>ZSCAN25</i>      | 0.2707  | 0.05777 | 5.26 x 10 <sup>-06</sup> |
| 5   | rs76900544  | 12431911  | <i>LOC105374655</i> | 0.4841  | 0.1037  | 5.64 x 10 <sup>-06</sup> |
| 10  | rs76413989  | 88296949  | <i>LOC105378408</i> | 0.6007  | 0.1291  | 6.01 x 10 <sup>-06</sup> |
| 7   | rs28988607  | 99354299  | <i>CYP3A4</i>       | -0.2682 | 0.05771 | 6.13 x 10 <sup>-06</sup> |
| 7   | rs55897278  | 43368490  | <i>HECW1</i>        | 0.5437  | 0.1172  | 6.35 x 10 <sup>-06</sup> |
| 1   | rs57170892  | 236671737 | <i>LGALS8</i>       | -0.4597 | 0.09939 | 6.85 x 10 <sup>-06</sup> |
| X   | rs4827173   | 39694548  | <i>LOC105373179</i> | 0.1975  | 0.04334 | 9.14 x 10 <sup>-06</sup> |
| 5   | rs114077855 | 177741760 | <i>COL23A1</i>      | -0.8805 | 0.1932  | 9.20 x 10 <sup>-06</sup> |
| 2   | rs7605051   | 76641171  | ---                 | 0.2512  | 0.05512 | 9.24 x 10 <sup>-06</sup> |
| 10  | rs116239652 | 72699435  | <i>LOC105378349</i> | -0.5633 | 0.1241  | 9.83 x 10 <sup>-06</sup> |

Base pairs (BP) location based on assembly GRCh37.p13

**Table 2S. Association of Top SNPs with Longitudinal TAC Troughs Adjusted for CYP3A5\*3 (rs776746) in the Discovery Cohort**

| CHR | SNP         | BP        | Locus        | BETA    | Lower   | Upper   | P-value                  |
|-----|-------------|-----------|--------------|---------|---------|---------|--------------------------|
| 7   | rs6956305   | 99643687  | ZSCAN25      | 0.5128  | 0.3861  | 0.6394  | 2.90 x 10 <sup>-15</sup> |
| 7   | rs17161880  | 99750738  | CYP3AP2      | -0.2771 | -0.3633 | -0.1908 | 3.50 x 10 <sup>-10</sup> |
| 3   | rs528004021 | 192127260 |              | 1.3039  | 0.887   | 1.7209  | 9.90 x 10 <sup>-10</sup> |
| 7   | rs34880695  | 99750432  | CYP3AP2      | -0.2768 | -0.3676 | -0.186  | 2.60 x 10 <sup>-9</sup>  |
| 11  | rs73456465  | 44945675  | TP53I11      | 0.628   | 0.4188  | 0.8373  | 4.40 x 10 <sup>-9</sup>  |
| 14  | rs74064870  | 75242744  | ---          | 0.4799  | 0.3198  | 0.6401  | 4.70 x 10 <sup>-9</sup>  |
| X   | rs115026930 | 113500375 | ---          | 0.342   | 0.2125  | 0.4714  | 2.40 x 10 <sup>-7</sup>  |
| 8   | rs114484963 | 16869931  | ---          | 1.1102  | 0.6874  | 1.5331  | 2.80 x 10 <sup>-7</sup>  |
| 6   | rs73774057  | 134421613 | ---          | 0.5785  | 0.3571  | 0.7999  | 3.20 x 10 <sup>-7</sup>  |
| X   | rs144708905 | 8359071   | ---          | 0.6032  | 0.3702  | 0.8362  | 4.10 x 10 <sup>-7</sup>  |
| 3   | rs114972846 | 113363113 | KIAA2018     | 1.0002  | 0.6122  | 1.3881  | 4.60 x 10 <sup>-7</sup>  |
| 7   | rs114447591 | 99099823  | ZNF394       | 0.5154  | 0.3149  | 0.7158  | 4.90 x 10 <sup>-7</sup>  |
| 5   | rs76900544  | 12431911  | LOC105374655 | 0.4135  | 0.2514  | 0.5755  | 6.00 x 10 <sup>-7</sup>  |
| 7   | rs55638814  | 99009873  | BUD31        | 0.4763  | 0.2876  | 0.665   | 7.90 x 10 <sup>-7</sup>  |
| 19  | rs73546081  | 39848216  | SAMD4B       | 0.3104  | 0.1846  | 0.4362  | 1.40 x 10 <sup>-6</sup>  |
| 18  | rs17067022  | 58172922  | ---          | 0.5623  | 0.3339  | 0.7907  | 1.50 x 10 <sup>-6</sup>  |
| 1   | rs74414717  | 231630430 | LOC102724041 | 0.8739  | 0.5174  | 1.2305  | 1.60 x 10 <sup>-6</sup>  |
| 2   | rs74613074  | 106183094 | ---          | 0.8326  | 0.492   | 1.1732  | 1.70 x 10 <sup>-6</sup>  |
| 12  | rs2723834   | 12055413  | ETV6         | 0.2726  | 0.1606  | 0.3847  | 1.90 x 10 <sup>-6</sup>  |
| 9   | rs12686780  | 95382297  | IPPK         | 0.3222  | 0.1889  | 0.4555  | 2.30 x 10 <sup>-6</sup>  |
| 2   | rs2541379   | 217594516 | LOC101928250 | 0.5499  | 0.3203  | 0.7796  | 2.80 x 10 <sup>-6</sup>  |
| 1   | rs74691910  | 182305870 | EIF1P3       | 0.7299  | 0.4225  | 1.0374  | 3.40 x 10 <sup>-6</sup>  |
| 13  | rs190368405 | 30083432  | SLC7A1       | 1.4055  | 0.8124  | 1.9985  | 3.50 x 10 <sup>-6</sup>  |
| 7   | rs5887568   | 132040954 | PLXNA4       | 0.458   | 0.2647  | 0.6514  | 3.50 x 10 <sup>-6</sup>  |
| 22  | rs116324909 | 24583271  | SUSD2        | 1.4039  | 0.811   | 1.9968  | 3.60 x 10 <sup>-6</sup>  |
| 20  | rs75727840  | 31581049  | SUN5         | 0.5452  | 0.3144  | 0.776   | 3.80 x 10 <sup>-6</sup>  |
| 8   | rs116405247 | 5418659   | ---          | 0.8363  | 0.4794  | 1.1932  | 4.50 x 10 <sup>-6</sup>  |
| 7   | rs17161774  | 99210648  | GSI-259H13.2 | -0.3754 | -0.5363 | -0.2144 | 5.00 x 10 <sup>-6</sup>  |
| 12  | rs11051969  | 32537123  | BICD1        | 0.2506  | 0.1429  | 0.3584  | 5.30 x 10 <sup>-6</sup>  |
| 1   | rs72959728  | 87695723  | LOC101927844 | 0.517   | 0.2946  | 0.7394  | 5.40 x 10 <sup>-6</sup>  |
| 1   | rs4652106   | 175655562 | TNR          | 0.7161  | 0.4047  | 1.0274  | 6.80 x 10 <sup>-6</sup>  |
| 12  | rs12829636  | 94639322  | PLXNC1       | 0.6684  | 0.3777  | 0.9591  | 6.80 x 10 <sup>-6</sup>  |
| 12  | rs75934992  | 105564414 | APPL2        | 0.8214  | 0.4621  | 1.1807  | 7.70 x 10 <sup>-6</sup>  |
| 18  | rs554238    | 5986825   | L3MBTL4      | 0.2022  | 0.1136  | 0.2909  | 8.00 x 10 <sup>-6</sup>  |
| 16  | rs16972052  | 19487835  | TMC5         | 0.2449  | 0.1371  | 0.3527  | 8.70 x 10 <sup>-6</sup>  |
| 4   | rs10002236  | 91608632  | CCSER1       | 0.4618  | 0.2583  | 0.6652  | 8.90 x 10 <sup>-6</sup>  |
| 1   | rs74113796  | 109784294 | SARS         | 0.487   | 0.2723  | 0.7016  | 9.00 x 10 <sup>-6</sup>  |
| 4   | rs60778684  | 7953472   | AFAP1        | -0.2731 | -0.3937 | -0.1525 | 9.30 x 10 <sup>-6</sup>  |
| 14  | rs73267896  | 64761816  | ESR2         | 1.0029  | 0.5599  | 1.4458  | 9.40 x 10 <sup>-6</sup>  |
| 14  | rs73271817  | 64830793  | ESR2         | 1.0035  | 0.5602  | 1.4467  | 9.40 x 10 <sup>-6</sup>  |
| 4   | rs191935015 | 180014111 | ---          | 0.7349  | 0.4094  | 1.0605  | 9.90 x 10 <sup>-6</sup>  |

Base pairs (BP) location based on assembly GRCh37.p13

**Table 3S. TAC Model in African Americans in the discovery cohort: ln of Dose-Normalized TAC Trough Concentrations with Clinical Factors and rs776746 and rs41303343 (CYP3A5\*3 and \*7) LOF Alleles.\***

| Variable                      | Group#      | Reference Group | Estimate | Lower  | Upper  | P-value      |
|-------------------------------|-------------|-----------------|----------|--------|--------|--------------|
| <b>Intercept</b>              |             |                 | -1.378   | -1.686 | -1.071 | 7.30 x 10-16 |
| <b>Transplant Center</b>      | B           | A               | 0.521    | 0.226  | 0.817  | 2.10 x 10-03 |
|                               | C           | A               | 0.123    | -0.116 | 0.361  | .            |
| <b>Time (days)</b>            |             |                 | 0.098    | 0.077  | 0.118  | 1.40 x 10-17 |
| <b>Time Post Day 9 (days)</b> |             |                 | -0.097   | -0.118 | -0.077 | 7.10 x 10-17 |
| <b>Age Group</b>              | 18-34       | 65-84           | -0.311   | -0.592 | -0.031 | 6.10 x 10-02 |
|                               | 35-64       | 65-84           | -0.162   | -0.411 | 0.087  | .            |
| <b>GFR</b>                    |             |                 | -0.002   | -0.004 | -0.001 | 1.00 x 10-03 |
| <b>Anti CMV Drug Use</b>      |             |                 | 0.084    | 0.051  | 0.117  | 6.10 x 10-07 |
| <b>SPK</b>                    |             |                 | 0.429    | 0.158  | 0.700  | 1.90 x 10-03 |
| <b>Antibody Induction</b>     | Combination | Polyclonal      | -0.272   | -0.724 | 0.181  | 6.60 x 10-02 |
|                               | Monoclonal  | Polyclonal      | 0.134    | 0.015  | 0.253  | .            |
|                               | None        | Polyclonal      | 0.106    | -0.300 | 0.513  | .            |
| <b>rs776746 (*3)</b>          |             |                 | 0.3622   | 0.276  | 0.449  | 3.80 x 10-16 |
| <b>rs41303343 (*7)</b>        |             |                 | 0.5754   | 0.438  | 0.713  | 3.00 x 10-16 |

\*Longitudinal model with random intercept and time slopes.

#Three centers included in the discovery cohort.

**Table 4S. TAC Levels Model in African Americans in Validation Cohort. ln of Dose-Normalized TAC Trough Concentration with Clinical Factors.\***

| Variable                      | Group#      | Reference Group | Estimate | Lower   | Upper  | P-value                  |
|-------------------------------|-------------|-----------------|----------|---------|--------|--------------------------|
| <b>Intercept</b>              |             |                 | -0.9     | -1.292  | -0.507 | 1.20 x 10 <sup>-05</sup> |
| <b>Transplant Center</b>      | B           | A               | 0.723    | 0.406   | 1.039  | 3.40 x 10 <sup>-04</sup> |
|                               | D           | A               | 0.01     | -0.287  | 0.307  | .                        |
|                               | C           | A               | 0.189    | -0.109  | 0.487  | .                        |
|                               | E           | A               | -0.019   | -0.264  | 0.227  | .                        |
| <b>Time (days)</b>            |             |                 | 0.059    | 0.035   | 0.083  | 3.00 x 10 <sup>-06</sup> |
| <b>Time Post Day 9 (days)</b> |             |                 | -0.058   | -0.082  | -0.034 | 5.60 x 10 <sup>-06</sup> |
| <b>Age Group</b>              | 18-34       | 65-84           | -0.307   | -0.66   | 0.046  | 3.80 x 10 <sup>-02</sup> |
|                               | 35-64       | 65-84           | -0.084   | -0.405  | 0.238  | .                        |
| <b>GFR</b>                    |             |                 | -0.001   | -0.003  | 0.001  | 3.00 x 10 <sup>-01</sup> |
| <b>Anti CMV Drug Use</b>      |             |                 | 0.082    | 0.04    | 0.125  | 1.40 x 10 <sup>-04</sup> |
| <b>SPK</b>                    |             |                 | 0.491    | 0.134   | 0.848  | 7.00 x 10 <sup>-03</sup> |
| <b>Antibody Induction</b>     | Combination | Polyclonal      | -0.068   | -0.599  | 0.464  | 4.50 x 10 <sup>-02</sup> |
|                               | Monoclonal  | Polyclonal      | 0.188    | 0.031   | 0.345  | .                        |
|                               | None        | Polyclonal      | -0.3523  | -0.9808 | 0.2761 | .                        |

\*Longitudinal model with random intercept and time slopes.

#All 5 centers included in the validation cohort.

**Table 5S. TAC Model in African Americans in the validation cohort. ln of Dose-Normalized TAC Trough Concentration with Clinical Factors and *CYP3A5*\*3, \*6, and \*7 (rs776746, rs10264272, and rs41303343) LoF Alleles.\***

| Variable                      | Group       | Reference Group | Estimate | Lower  | Upper  | P-value                  |
|-------------------------------|-------------|-----------------|----------|--------|--------|--------------------------|
| <b>Intercept</b>              |             |                 | -1.248   | -1.606 | -0.89  | 1.60 x 10 <sup>-10</sup> |
| <b>Transplant Center</b>      | B           | A               | 0.646    | 0.372  | 0.919  | 2.40 x 10 <sup>-04</sup> |
|                               | D           | A               | 0.062    | -0.193 | 0.318  | .                        |
|                               | C           | A               | 0.12     | -0.133 | 0.373  | .                        |
|                               | E           | A               | 0.004    | -0.205 | 0.212  | .                        |
| <b>Time (days)</b>            |             |                 | 0.057    | 0.034  | 0.081  | 4.10 x 10 <sup>-06</sup> |
| <b>Time Post Day 9 (days)</b> |             |                 | -0.057   | -0.081 | -0.033 | 7.40 x 10 <sup>-06</sup> |
| <b>Age Group</b>              | 18-34       | 65-84           | -0.253   | -0.552 | 0.047  | 4.30 x 10 <sup>-02</sup> |
|                               | 35-64       | 65-84           | -0.065   | -0.336 | 0.207  | .                        |
| <b>GFR</b>                    |             |                 | -0.001   | -0.002 | 0.001  | 4.60 x 10 <sup>-01</sup> |
| <b>Anti CMV Drug Use</b>      |             |                 | 0.085    | 0.043  | 0.127  | 7.70 x 10 <sup>-05</sup> |
| <b>SPK</b>                    |             |                 | 0.481    | 0.176  | 0.785  | 2.00 x 10 <sup>-03</sup> |
| <b>Antibody Induction</b>     | Combination | Polyclonal      | -0.193   | -0.646 | 0.26   | 7.30 x 10 <sup>-02</sup> |
|                               | Monoclonal  | Polyclonal      | 0.151    | 0.017  | 0.285  | .                        |
|                               | None        | Polyclonal      | -0.1316  | -0.665 | 0.402  | .                        |
| <b>rs776746 (*3)</b>          |             |                 | 0.4084   | 0.306  | 0.511  | 9.40 x 10 <sup>-15</sup> |
| <b>rs10264272 (*6)</b>        |             |                 | 0.2436   | 0.11   | 0.377  | 3.50 x 10 <sup>-04</sup> |
| <b>rs41303343 (*7)</b>        |             |                 | 0.3699   | 0.216  | 0.524  | 2.50 x 10 <sup>-06</sup> |

\*Longitudinal model with random intercept and time slopes

**Table 6S. TAC Model in African Americans in the Validation Cohort. ln of Dose-Normalized TAC Trough Concentration with Clinical Factors and Number of *CYP3A5*\*3, \*6, and \*7 (rs776746, rs10264272, and rs41303343) LoF Alleles.**

| Variable                      | Group       | Reference Group | Estimate | Lower  | Upper  | P-value                  |
|-------------------------------|-------------|-----------------|----------|--------|--------|--------------------------|
| <b>Intercept</b>              |             |                 | -1.269   | -1.632 | -0.907 | 1.30 x 10 <sup>-10</sup> |
| <b>Transplant Center</b>      | UMN         | UAB             | 0.662    | 0.388  | 0.936  | 1.40 x 10 <sup>-04</sup> |
|                               | HCMC        | UAB             | 0.034    | -0.222 | 0.289  | .                        |
|                               | Mayo        | UAB             | 0.141    | -0.115 | 0.396  | .                        |
|                               | UI          | UAB             | 0.002    | -0.209 | 0.214  | .                        |
| <b>Time (days)</b>            |             |                 | 0.058    | 0.035  | 0.082  | 3.00 x 10 <sup>-06</sup> |
| <b>Time Post Day 9 (days)</b> |             |                 | -0.058   | -0.082 | -0.034 | 5.50 x 10 <sup>-06</sup> |
| <b>Age Group</b>              | 18-34       | 65-84           | -0.246   | -0.55  | 0.058  | 5.60 x 10 <sup>-02</sup> |
|                               | 35-64       | 65-84           | -0.064   | -0.34  | 0.212  | .                        |
| <b>GFR</b>                    |             |                 | -0.001   | -0.002 | 0.001  | 4.70 x 10 <sup>-01</sup> |
| <b>Anti CMV Drug Use</b>      |             |                 | 0.085    | 0.043  | 0.127  | 7.40 x 10 <sup>-05</sup> |
| <b>SPK</b>                    |             |                 | 0.478    | 0.171  | 0.785  | 2.30 x 10 <sup>-03</sup> |
| <b>Antibody Induction</b>     | Combination | Polyclonal      | -0.219   | -0.677 | 0.238  | 2.70 x 10 <sup>-02</sup> |
|                               | Monoclonal  | Polyclonal      | 0.171    | 0.036  | 0.307  | .                        |
|                               | None        | Polyclonal      | -0.1842  | -0.722 | 0.354  | .                        |
| <b>LoF*</b>                   |             |                 | 0.3582   | 0.267  | 0.45   | 2.20 x 10 <sup>-14</sup> |

\*LoF: Loss of function allele
